# Supplementary material for: Surface refined AuQuercetinnanoconjugate stimulates dermal cell migration: possible implication in wound healing
Source: Royal Society of Chemistry journal article supplement (doi:10.1039/d0ra06690g), 2020-01-01
Supplement: d0ra06690g5.pdf [file d0ra06690g5.pdf]

Supplementary information

Table 1. Amount of quercetin in Au<sup>Qur</sup>NP

|                                  | Quercetin entrapment efficiency (%) | Free Quercetin (ng/ml) |
|----------------------------------|-------------------------------------|------------------------|
| AuNP                             | 0                                   | 0                      |
| Au <sup>Qur</sup> NP (0.5 μg/L)  | 58.2 (± 2.9)                        | 5.2 (± 1.6)            |
| Au <sup>Qur</sup> NP (1.0 μg/L)  | 63.2 (± 4.3)                        | 3.8 (± 1.5)            |
| Au <sup>Qur</sup> NP (5.0 μg/L)  | 61.9 (± 5.4)                        | 4.6 (± 0.6)            |
| Au <sup>Qur</sup> NP (10.0 μg/L) | 51.4 (± 6.9)                        | 5.1 (± 0.3)            |

Figure 8. TGFβ1 Protein expression

| sample | β actin  |       | TGFβ1   |        | TGFβ1 /β actin |
|--------|----------|-------|---------|--------|----------------|
|        | vol      | norm  | vol     | norm   |                |
| 1      | 163032   | 100   | 8163.6  | 100    | 1              |
| 2      | 155884   | 95.62 | 3795.5  | 46.49  | 0.486195357    |
| 3      | 140852.8 | 86.4  | 4696.46 | 57.53  | 0.665856481    |
| 4      | 149300.2 | 91.58 | 9064.25 | 111.03 | 1.212382616    |
| 5      | 144442.5 | 88.6  | 5835.55 | 71.48  | 0.806772009    |
| 6      | 160650   | 98.54 | 2718.09 | 33.3   | 0.337933834    |
| 7      | 125721.5 | 77.11 | 2560.27 | 31.36  | 0.406691739    |

- TGFβ1 (Immature : 44-45 kDa ; cleaved : 13 kDa)

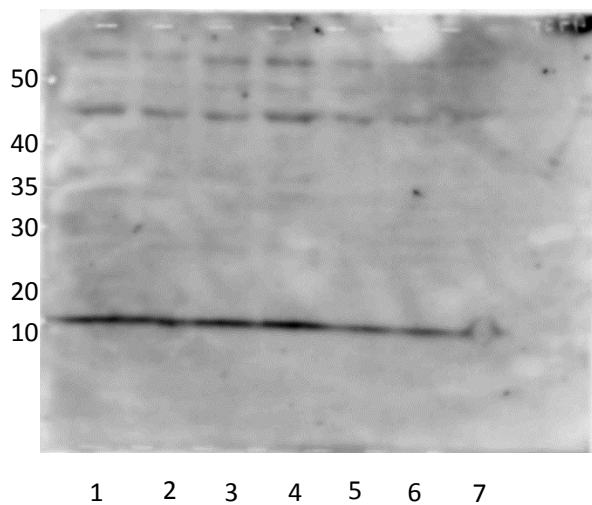

β actin (45 kDa)

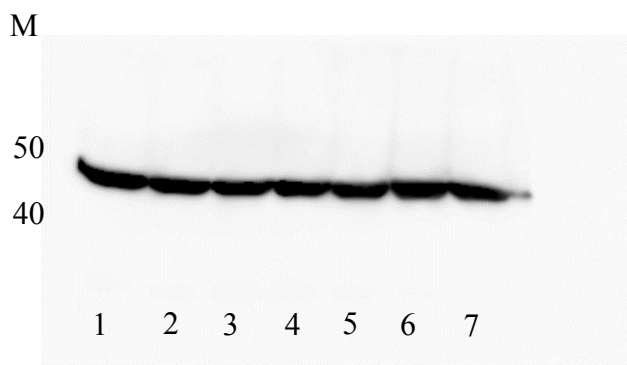

Figure 9. SMAD group Protein expression

SMAD 2 (60 KDa) Original Blot

| sample | SMAD 2   |        | SMAD 2/ $\beta$ actin |
|--------|----------|--------|-----------------------|
|        | vol      | norm   |                       |
| 1      | 129336.5 | 100    | 1                     |
| 2      | 134945   | 104.34 | 1.568079351           |
| 3      | 129884   | 100.42 | 0.901679088           |
| 4      | 157457.8 | 121.74 | 0.80708035            |
| 5      | 202657.1 | 156.69 | 1.093592965           |
| 6      | 107467   | 83.09  | 0.817493113           |
| 7      | 97673    | 75.52  | 0.596665877           |

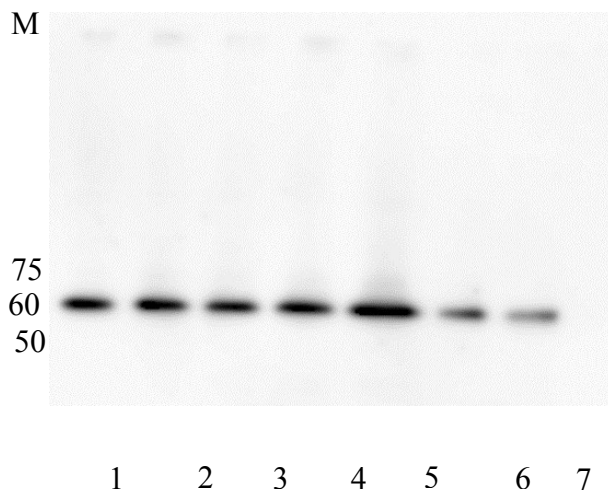

SMAD 3 (50 KDa) Original Blot

| sample | SMAD 3   |        | SMAD 3/ $\beta$ actin |
|--------|----------|--------|-----------------------|
|        | vol      | norm   |                       |
| 1      | 12314.63 | 100    | 1                     |
| 2      | 42341.65 | 343.83 | 3.319463217           |
| 3      | 64741.1  | 525.72 | 5.63593482            |
| 4      | 70984.57 | 576.42 | 6.533892541           |
| 5      | 36025.39 | 292.54 | 3.276657706           |
| 6      | 20838.36 | 169.22 | 1.979412797           |
| 7      | 9013.91  | 73.2   | 0.872363246           |

M

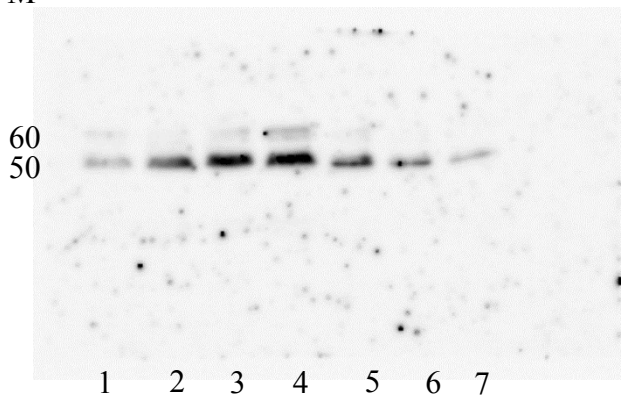

SMAD 4 ( 70 KDa) Original Blot

| sample | SMAD 4   |        | SMAD 4/ $\beta$ 1actin |
|--------|----------|--------|------------------------|
|        | vol      | norm   |                        |
| 1      | 16763.92 | 100    | 1                      |
| 2      | 54735.88 | 326.51 | 3.471664009            |
| 3      | 58110.5  | 346.64 | 4.458965783            |
| 4      | 114018.3 | 680.14 | 8.55306841             |
| 5      | 71577.03 | 426.97 | 8.260205069            |
| 6      | 34928.05 | 208.35 | 5.510446972            |
| 7      |          |        | 0                      |

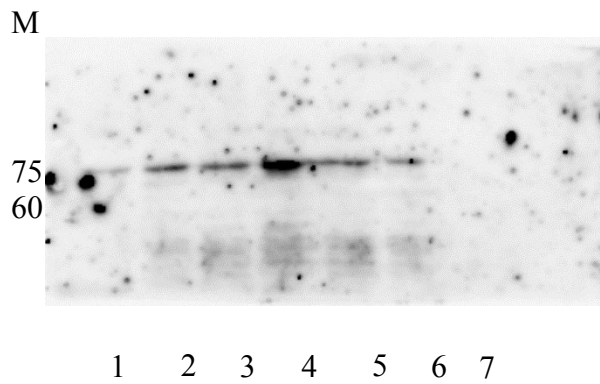

SMAD7 (46 kDa)

| sample | SMAD 7   |        | SMAD 7/ $\beta$ 1actin |
|--------|----------|--------|------------------------|
|        | vol      | norm   |                        |
| 1      | 3250     | 100    | 1                      |
| 2      | 4004     | 123.2  | 0.629695886            |
| 3      | 10377.85 | 319.32 | 1.369355461            |
| 4      | 4965.77  | 152.79 | 0.590743891            |
| 5      | 6052     | 186.22 | 0.851602872            |
| 6      | 7566     | 232.8  | 1.166741843            |
| 7      | 6647.67  | 204.54 | 1.299904671            |

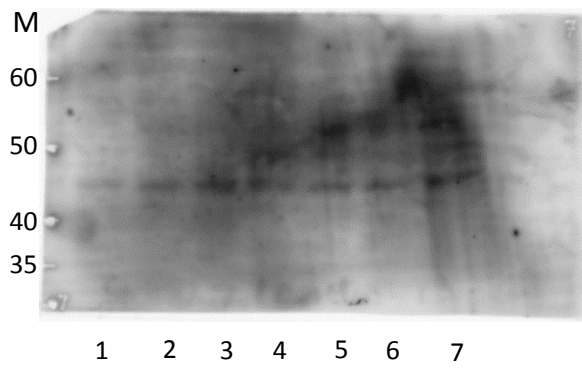

$\beta$  actin (45 kDa)

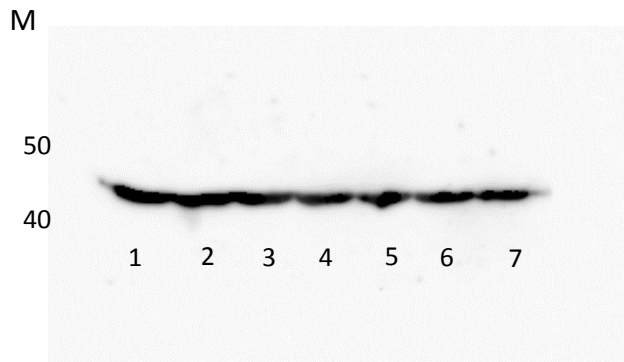

| sample | $\beta$ actin |        |
|--------|---------------|--------|
|        | vol           | norm   |
| 1      | 190560.8      | 100    |
| 2      | 197385.6      | 103.58 |
| 3      | 177764        | 93.28  |
| 4      | 168118.3      | 88.22  |
| 5      | 170132.9      | 89.28  |
| 6      | 162919        | 85.49  |
| 7      | 159894.1      | 83.91  |
